# Supplementary material for: New Insight into Taxonomy of European Mountain Pines, Pinus mugo Complex, Based on Complete Chloroplast Genomes Sequencing
Source: MDPI journal article supplement (doi:10.3390/plants10071331), 2021-06-29
Supplement: s1 [file s1]

Supplementary Table S1

**Supplementary Table S1.** List of genes annotated in the chloroplast genomes of *P. mugo*, *P. rotundata* and *P. uncinata* sequenced in this study.

| No.          | Classification of genes                                               | Name of genes                                                                                                                                                                                                                                                                                                                                    | Number     |
|--------------|-----------------------------------------------------------------------|--------------------------------------------------------------------------------------------------------------------------------------------------------------------------------------------------------------------------------------------------------------------------------------------------------------------------------------------------|------------|
| 1            | Photosystem I                                                         | <i>psaA, psaB, psaC, psaI, psaJ, psaM(x2), ycf3, ycf4</i>                                                                                                                                                                                                                                                                                        | 9          |
| 2            | Photosystem II                                                        | <i>psbA, psbB, psbC, psbD, psbE, psbF, psbH, psbI, psbJ, psbK, psbL, psbM, psbN, psbT, psbZ</i>                                                                                                                                                                                                                                                  | 15         |
| 3            | Cytochrome b/f complex                                                | <i>petA, petB, petD, petG, petL, petN</i>                                                                                                                                                                                                                                                                                                        | 6          |
| 4            | ATP synthase                                                          | <i>atpA, atpB, atpE, atpF, atpH, atpI</i>                                                                                                                                                                                                                                                                                                        | 6          |
| 5            | NADH dehydrogenase                                                    | <i>ndhB, ndhC, ndhD, ndhE, ndhH, ndhI, ndhK</i>                                                                                                                                                                                                                                                                                                  | 7          |
| 6            | RubisCO large subunit                                                 | <i>rbcL</i>                                                                                                                                                                                                                                                                                                                                      | 1          |
| 7            | RNA polymerase                                                        | <i>rpoA, rpoB, rpoC1, rpoC2</i>                                                                                                                                                                                                                                                                                                                  | 4          |
| 8            | Ribosomal proteins – small units (SSU)                                | <i>rps2, rps3, rps4, rps7, rps8, rps11, rps12, rps14, rps15, rps18, rps19</i>                                                                                                                                                                                                                                                                    | 11         |
| 9            | Ribosomal proteins – large units (LSU)                                | <i>rpl2, rpl14, rpl16, rpl20, rpl22, rpl23, rpl32, rpl33, rpl36</i>                                                                                                                                                                                                                                                                              | 9          |
| 10           | Other genes/Miscellaneous                                             | <i>accD, ccsA, cemA, chlB, chlL, chlN, clpP, infA, matK</i>                                                                                                                                                                                                                                                                                      | 9          |
| 11           | Protein of unknown function / Hypothetical chloroplast reading frames | <i>ycf1, ycf2, ycf12, ycf68</i>                                                                                                                                                                                                                                                                                                                  | 4          |
| 12           | Transfer RNAs                                                         | <i>trnA-UGC, trnC-GCA, trnD-GUC, trnE-UUC, trnF-GAA, trnFM-CAU, trnG-GCC, trnG-UCC, trnH-GUG (x2), trnI-GAU, trnK-UUU, trnL-CAA, trnL-UAG, trnL-UAA, trnM-CAU (x3), trnN-GUU, trnP-GGG, trnP-UGG, trnQ-UUG, trnR-ACG, trnR-CCG, trnR-UCU, trnS-UGA, trnS-GGA, trnS-GCU (x2), trnT-UGU, trnT-GGU, trnV-GAC (x2), trnV-UAC, trnW-CCA, trnY-GUA</i> | 36         |
| 13           | Ribosomal RNAs                                                        | <i>rrn4.5, rrn5, rrn16, rrn23</i>                                                                                                                                                                                                                                                                                                                | 4          |
| <b>Total</b> |                                                                       |                                                                                                                                                                                                                                                                                                                                                  | <b>121</b> |

(x2) indicates that the number of the repeat unit is 2
